# Supplementary material for: TERRA and the histone methyltransferase Dot1 cooperate to regulate senescence in budding yeast
Source: PubMed Central journal article supplement (PMC5896980; doi:10.1371/journal.pone.0195698), 2018-04-12
Supplement: pone.0195698.s001.pdf [file pone.0195698.s001.pdf]

## Spot assays

Haploid colonies containing either pGL2 or pGL3 were grown in SC-HIS+2% galactose on a roller drum at room temperature (23°C) until they reached log phase growth, counted with a Coulter counter, and diluted in sterile water to  $10^5$  cells/15  $\mu$ L. 10-fold serial dilutions ( $10^5$  to  $10^1$ ) were performed and about 15  $\mu$ L of each dilution was stamped onto SC-HIS+galactose plates with a pinner and incubated at either room temperature or 37°C for 2-3 days.

## Telomere PCR and sequencing

Telomere PCR was performed as described in [1] except after denaturation and C-tailing, the telomere ends were amplified using Accuprime GC-rich DNA polymerase (Invitrogen), Buffer A (comes with Accuprime), and a 3mM final concentration of magnesium sulfate. Then, 0.7U of Taq DNA polymerase was added to each reaction and incubated at 72°C for 8-10 minutes before purification and cloning. Sequences were aligned using VectorNTI.

## References

1. Kozak ML, Chavez A, Dang W, Berger SL, Ashok A, Guo X, et al. Inactivation of the Sas2 histone acetyltransferase delays senescence driven by telomere dysfunction. *EMBO J.* 2010;29: 158–70. doi:10.1038/emboj.2009.314
