# Supplementary material for: TERRA and the histone methyltransferase Dot1 cooperate to regulate senescence in budding yeast
Source: PubMed Central journal article supplement (PMC5896980; doi:10.1371/journal.pone.0195698), 2018-04-12
Supplement: pone.0195698.s007.pdf [file pone.0195698.s007.pdf]

| <b><u>Strain</u></b> | <b><u>Genotype</u></b>                                                                                                                           | <b><u>Source</u></b> |
|----------------------|--------------------------------------------------------------------------------------------------------------------------------------------------|----------------------|
| YJW5                 | <i>Mata/α his3Δ1/his3Δ1 leu2Δ0/leu2Δ0 ura3Δ0/ura3Δ0</i><br><i>MET15/met15Δ0 LYS2/lys2Δ0</i>                                                      | [1]                  |
| YJW25                | YJW5 + <i>EST2/est2Δ::HygMX4</i> + pGL3                                                                                                          | This study.          |
| YJW26                | YJW5 + <i>EST2/est2Δ::HygMX4</i> + pGL2                                                                                                          | This study.          |
| YJW6                 | YJW5 + <i>TLC1/tlc1Δ::LEU2</i>                                                                                                                   | This study.          |
| YGL2                 | YJW6 + pGL2                                                                                                                                      | This study.          |
| YGL3                 | YJW6 + pGL3                                                                                                                                      | This study.          |
| YJW170               | YJW6 + pJD1                                                                                                                                      | This study.          |
| YJW31                | <i>Mata/α TLC1/tlc1Δ::LEU2 EXO1/exo1Δ::CaURA3</i><br><i>his3Δ1/his3Δ1 leu2Δ0/leu2Δ0 ura3Δ0/ura3Δ0</i><br><i>MET15/met15Δ0 LYS2/lys2Δ0</i> + pGL2 | This study.          |
| YJW198               | <i>Mata/α TLC1/tlc1Δ::LEU2 DOT1/dot1Δ::KanMX4</i><br><i>his3Δ1/his3Δ1 leu2Δ0/leu2Δ0 ura3Δ0/ura3Δ0</i><br><i>MET15/met15Δ0 LYS2/lys2Δ0</i> + pGL2 | This study.          |
| YJW287               | <i>Mata/α TLC1/tlc1Δ::HygMX4 DOT1/dot1Δ::KanMX4</i><br><i>his3Δ1/his3Δ1 leu2Δ0/leu2Δ0 ura3Δ0/ura3Δ0</i><br><i>met15Δ0/met15Δ0 LYS2/LYS2</i>      | This study.          |
| YJW300               | YJW287 + pFvL901 + pGL2                                                                                                                          | This study.          |
| YJW301               | YJW287 + pFvL905 + pGL2                                                                                                                          | This study.          |
| YJW303               | YJW287 + pFvL914 + pGL2                                                                                                                          | This study.          |

|        |                                                                                                                                                                                      |             |
|--------|--------------------------------------------------------------------------------------------------------------------------------------------------------------------------------------|-------------|
| YJW291 | <i>Mata/α RAD9/rad9Δ::KanMX4 TLC1/tlc1Δ::LEU2<br/>his3Δ1/his3Δ1 leu2Δ0/leu2Δ0 ura3Δ0/ura3Δ0<br/>met15Δ0/met15Δ0 LYS2/LYS2 + pGL2</i>                                                 | This study. |
| YJW292 | <i>Mata/α TLC1/tlc1Δ::LEU2 Rad52/rad52Δ::HygMX4<br/>RNH1/rnh1Δ::KanMX4 RNH201/rnh201Δ::KanMX4<br/>his3Δ1/his3Δ1 leu2Δ0/leu2Δ0 ura3Δ0/ura3Δ0<br/>MET15/met15Δ0 LYS2/lys2Δ0 + pGL2</i> | This study. |
| YJW417 | <i>Mata/α RAD52/rad52Δ::HygMX4 TLC1/tlc1Δ::HygMX4<br/>DOT1/dot1Δ::KanMX4 his3Δ1/his3Δ1 leu2Δ0/leu2Δ0<br/>ura3Δ0/ura3Δ0 MET15/met15Δ0 lys2Δ0/lys2Δ0 + pGL2</i>                        | This study. |
| YMK324 | <i>Mata/α TLC1/tlc1Δ::LEU2 TEL1/tel1Δ::KanMX4<br/>SAS2/sas2Δ::HygMX4 his3Δ1/his3Δ1 leu2Δ0/leu2Δ0<br/>ura3Δ0/ura3Δ0 MET15/met15Δ0 LYS2/lys2Δ0</i>                                     | [2]         |
| YGL17  | YMK324 + pGL2                                                                                                                                                                        | This study. |
| YGL18  | YMK324 + pGL3                                                                                                                                                                        | This study. |
| YJW40  | <i>Mata his3Δ1 leu2Δ0 met15Δ0 ura3Δ0 + pGL2</i>                                                                                                                                      | This study. |
| YJW41  | Biological replicate of YJW40.                                                                                                                                                       | This study. |
| YJW48  | <i>Mata yKu70Δ::KanMX4 his3Δ1 leu2Δ0 met15Δ0 ura3Δ0<br/>+ pGL2</i>                                                                                                                   | This study. |
| YJW49  | Biological replicate of YJW48.                                                                                                                                                       | This study. |
| YJW50  | <i>Mata yKu80Δ::KanMX4 his3Δ1 leu2Δ0 met15Δ0 ura3Δ0<br/>+ pGL2</i>                                                                                                                   | This study. |

|       |                                                                   |             |
|-------|-------------------------------------------------------------------|-------------|
| YJW51 | Biological replicate of YJW50.                                    | This study. |
| YJW66 | <i>Mata yKu70Δ::KanMX4 his3Δ1 leu2Δ0 met15Δ0 ura3Δ0</i><br>+ pGL3 | This study. |
| YJW67 | Biological replicate of YJW66.                                    | This study. |
| YJW68 | <i>Mata yKu80Δ::KanMX4 his3Δ1 leu2Δ0 met15Δ0 ura3Δ0</i><br>+ pGL3 | This study. |
| YJW69 | Biological replicate of YJW68.                                    | This study. |
| YJW78 | <i>Mata his3Δ1 leu2Δ0 met15Δ0 ura3Δ0</i> + pGL3                   | This study. |
| YJW79 | Biological replicate of YJW78.                                    | This study. |

## References

1. Brachmann CB, Davies a, Cost GJ, Caputo E, Li J, Hieter P, et al. Designer deletion strains derived from *Saccharomyces cerevisiae* S288C: a useful set of strains and plasmids for PCR-mediated gene disruption and other applications. *Yeast*. 1998;14: 115–32. doi:10.1002/(SICI)1097-0061(19980130)14:2<115::AID-YEA204>3.0.CO;2-2
2. Kozak ML, Chavez A, Dang W, Berger SL, Ashok A, Guo X, et al. Inactivation of the Sas2 histone acetyltransferase delays senescence driven by telomere dysfunction. *EMBO J*. 2010;29: 158–70. doi:10.1038/emboj.2009.314
