# Supplementary material for: TERRA and the histone methyltransferase Dot1 cooperate to regulate senescence in budding yeast
Source: PubMed Central journal article supplement (PMC5896980; doi:10.1371/journal.pone.0195698), 2018-04-12
Supplement: pone.0195698.s008.pdf [file pone.0195698.s008.pdf]

| <u>Oligonucleotide</u> | <u>Sequence</u>                 | <u>Reference</u> |
|------------------------|---------------------------------|------------------|
| SPC42 F                | AAGAGCTGCAAAGCATGATGGAC         | [1]              |
| SPC42 R                | GACTGGATTGGGAAGAATGACGA         | [1]              |
| 10R F                  | CGGTTATGGTGGACGGTGGATG          | [2]              |
| 10R R                  | CCTAACCCCTATTCTAATCCAACCCTGATAA | [2]              |
| 13R F                  | ACGGTTATGGTGCACGATGGG           | [2]              |
| 13R R                  | TTACCCTCCATTACGCTACCTCC         | [2]              |
| 15L F                  | GGGTAACGAGTGGGGAGGTAA           | [2]              |
| 15L R                  | CAACACTACCCTAATCTAACCCCTGT      | [2]              |
| 6R F                   | GGCAAGGGTAAAAACCAGTGAGG         | This study.      |
| 6R R                   | GACCCAGTCCTCATTTCATCAA          | This study.      |
| 4L F                   | GGAGTGGATGGTTGAGTGGGG           | [2]              |
| 4L R                   | CTAACACTACCCTATTCTAACCCCTGATTTT | [2]              |
| 10R/14R F              | GGATGGTGGTTGGAGTTGTAGAATG       | [2]              |
| 10R/14R R              | ATCCAACCCTGATAAACCTGTCTCTT      | [2]              |
| 1L F                   | TGGCCAACCTGTCTCTCAACTT          | This study.      |
| 1L R                   | AGGGTAACGGTGGGTGAGTGGTA         | This study.      |
| Y'10 F                 | TTTGGTTGAACATCCGGGTAAGA         | This study.      |
| Y'10 R                 | CATAGCCCTAAATAGCCCTAAATAGCC     | This study.      |
| Y'6 F                  | GGCTTGGAGGAGACGTACATG           | [2]              |
| Y'6 R                  | CTCGCTGTCACTCCTTACCCG           | [2]              |
| Y'3 F                  | GGCTTGGAGGAGACGTACATG           | [2]              |
| Y'3 R                  | CCACACACTCTCTCACATCTACCTC       | [2]              |

|             |                               |             |
|-------------|-------------------------------|-------------|
| Tel6R-0.1-F | TGAGGCCATTTCCGTGTGTA          | [3]         |
| Tel6R-0.1-R | CCCAGTCCTCATTTCATCAA          | [3]         |
| Tel6R-0.2-F | CCTTTTTTGGATATAACTGTCCGGAGAGT | [3]         |
| Tel6R-0.2-R | TCCGAACGCTATTCCAGAAAGT        | [3]         |
| Tel6R-3.6-F | TCTCGGTGAACGGATGCA            | [3]         |
| Tel6R-3.6-R | CACGACAAAACCACCGATGA          | [3]         |
| Tel6R-7.3-F | TGCGAAATAAGAACACGATCGT        | [3]         |
| Tel6R-7.3-R | GTAGAAGGGCCGACATGTACTACA      | [3]         |
| CA F        | ACACACCACACCACACACCACAC       | This study. |
| CA R        | GGCGTGAATGTAAGCGTGACATAA      | This study. |

## References

1. Platt JM, Ryvkin P, Wanat JJ, Donahue G, Ricketts MD, Barrett SP, et al. Rap1 relocalization contributes to the chromatin-mediated gene expression profile and pace of cell senescence. *Genes Dev.* 2013;27: 1406–20. doi:10.1101/gad.218776.113
2. Iglesias N, Redon S, Pfeiffer V, Dees M, Lingner J, Luke B. Subtelomeric repetitive elements determine TERRA regulation by Rap1/Rif and Rap1/Sir complexes in yeast. *EMBO Rep.* 2011;12: 587–93. doi:10.1038/embor.2011.73
3. Kozak ML, Chavez A, Dang W, Berger SL, Ashok A, Guo X, et al. Inactivation of the Sas2 histone acetyltransferase delays senescence driven by telomere dysfunction. *EMBO J.* 2010;29: 158–70. doi:10.1038/emboj.2009.314
